# Supplementary material for: Extracorporeal Elimination of Pro- and Anti-inflammatory Modulators by the Cytokine Adsorber CytoSorb® in Patients with Hyperinflammation: A Prospective Study
Source: PubMed Central journal article supplement — Infect Dis Ther. 2024 Aug 18;13(9):2089–101. doi: 10.1007/s40121-024-01028-8 (PMC11343926; doi:10.1007/s40121-024-01028-8), 2024-08-18
Supplement: 40121_2024_1028_MOESM1_ESM.pdf [file 40121_2024_1028_MOESM1_ESM.pdf]

**Extracorporeal Elimination of Pro- and Anti-Inflammatory Modulators by  
the Cytokine Adsorber Cytosorb® in Patients with Hyperinflammation:**

**A Prospective Study**

Helen Graf MD<sup>1,\*</sup>, Caroline Gräfe MD<sup>1,\*</sup>, Mathias Bruegel MD<sup>2</sup>, Felix L. Happich MD<sup>2</sup>,  
Vassilissa Wustrow MD<sup>1</sup>, Aljoscha Wegener MD<sup>1</sup>, Wolfgang Wilfert Mr<sup>2</sup>, Michael Zoller  
MD<sup>1</sup>, Uwe Liebchen MD<sup>1</sup>, Michael Paal MD<sup>2,§</sup>, Christina Scharf MD<sup>1,§,#</sup>

<sup>1</sup>... Department of Anesthesiology, LMU hospital, Munich, Germany.

<sup>2</sup>... Institute of Laboratory Medicine, LMU hospital, Munich, Germany.

# Corresponding author: Dr. Christina Scharf-Janßen, Department of Anesthesiology, LMU hospital,  
Marchioninistrasse 15, 81377 Munich, Germany. E-Mail: [Christina.Scharf-Janssen@med.uni-  
muenchen.de](mailto:Christina.Scharf-Janssen@med.uni-muenchen.de)

\* Shared first authorship

§ Shared last authorship

Table S1: IL-1 $\beta$  concentration (pg/ml) pre- and post-Cytosorb® at different timepoints

| Patient | D1 pre | D1 post | D2 pre | D2 post | D3 pre | D3 post | D4 pre | D4 post | D5 pre | D5 post |
|---------|--------|---------|--------|---------|--------|---------|--------|---------|--------|---------|
| 1       | 30,45  | 16,58   | 36,75  | 29,25   | 46,52  | 39,83   | 39,12  | 36,75   | 37,23  | 38,17   |
| 2       | 27,21  | 15,71   | 28,05  | 20,16   | 21,87  | 20,16   | 17,58  | 15,96   | 13,96  | 12,7    |
| 3       |        |         |        |         |        |         |        |         |        |         |
| 4       | 7,77   | 1,8     | 6,5    | 3,41    | 6,15   | 3,78    | 5,91   | 3,54    | 5,44   | 3,05    |
| 5       |        |         |        |         |        |         |        |         |        |         |
| 6       |        |         |        |         |        |         |        |         |        |         |
| 7       |        |         |        |         |        |         |        |         |        |         |
| 8       |        |         |        |         |        |         |        |         |        |         |
| 9       | 1,8    | 0,49    | 1,29   | 0,76    | 2,06   | 1,29    | 3,78   | 3,9     | 5,68   | 5,09    |
| 10      | 3,14   | 1,57    | 2,38   | 2,38    | 3,7    | 3,14    | 3,88   | 3,14    | 3,88   | 4,06    |
| 11      | 3,14   | 0,69    | 1,98   | 1,57    | 2,76   | 1,57    | 1,98   | 1,14    |        |         |
| 12      | 5,99   | 0,17    | 5,47   | 0,17    | 4,78   | 1,98    | 4,95   | 2,38    |        |         |
| 13      | 12,08  | 3,14    | 8,95   | 5,13    | 6,66   | 4,24    | 2,18   | 1,98    | 1,14   | 1,57    |
| 14      | 4,6    | 1,98    | 4,24   | 2,57    | 3,52   | 3,33    | 4,95   | 4,24    |        |         |
| 15      |        |         |        |         |        |         |        |         |        |         |

Note: D1: ten minutes after initiation of Cytosorb®, D2: one hour after initiation of Cytosorb®, D3: three hours after initiation of Cytosorb®, D4: six hours after initiation of Cytosorb®, D5: twelve hours after initiation of Cytosorb®, pre: extracorporeal IL-1 $\beta$  concentration pre-Cytosorb®, post: extracorporeal IL-1 $\beta$  concentration post-Cytosorb®.

Table S2: IL-2 concentration (pg/ml) pre- and post-Cytosorb® at different timepoints

| Patient | D1 pre | D1 post | D2 pre | D2 post | D3 pre | D3 post | D4 pre | D4 post | D5 pre | D5 post |
|---------|--------|---------|--------|---------|--------|---------|--------|---------|--------|---------|
| 1       | 142,6  | 28,6    | 143,2  | 95,8    | 173,5  | 123,7   | 154,7  | 121,3   | 89,3   | 88,8    |
| 2       | 59,1   | 17,2    | 48,9   | 32,4    | 39,8   | 38,5    | 33,6   | 34,8    | 31,7   | 23,6    |
| 3       |        |         |        |         |        |         |        |         |        |         |
| 4       | 22,1   | 6,4     | 17,6   | 7,8     | 15,7   | 7,1     | 13,1   | 5,0     | 5,0    | 2,9     |
| 5       |        |         |        |         |        |         |        |         |        |         |
| 6       |        |         |        |         |        |         |        |         |        |         |
| 7       |        |         |        |         |        |         |        |         |        |         |
| 8       |        |         |        |         |        |         |        |         |        |         |
| 9       |        |         |        |         |        |         |        |         |        |         |
| 10      |        |         |        |         |        |         |        |         |        |         |
| 11      |        |         |        |         |        |         |        |         |        |         |
| 12      | 38,99  | 3,0     | 36,78  | 10,7    | 24,7   | 12,3    | 21,7   | 13,9    |        |         |
| 13      |        |         |        |         |        |         |        |         |        |         |
| 14      |        |         |        |         |        |         |        |         |        |         |
| 15      |        |         |        |         |        |         |        |         |        |         |

Note: D1: ten minutes after initiation of Cytosorb®, D2: one hour after initiation of Cytosorb®, D3: three hours after initiation of Cytosorb®, D4: six hours after initiation of Cytosorb®, D5: twelve hours after initiation of Cytosorb®, pre: extracorporeal IL-2 concentration pre-Cytosorb®, post: extracorporeal IL-2 concentration post-Cytosorb®.

Table S3: IL-6 concentration (pg/ml) pre- and post-Cytosorb® at different timepoints

| Patient | D1 pre | D1 post | D2 pre | D2 post | D3 pre | D3 post | D4 pre | D4 post | D5 pre   | D5 post |
|---------|--------|---------|--------|---------|--------|---------|--------|---------|----------|---------|
| 1       | 715108 | 305624  | 609996 | 553416  | 683028 | 584941  | 658822 | 689250  | 1,07E+06 | 980699  |
| 2       | 245136 | 167440  | 194115 | 147797  | 180775 | 175462  | 161896 | 154956  | 149498   | 143269  |
| 3       | 416    | 113     | 574    | 282     | 402    | 336     | 370    | 320     | 320      | 279     |
| 4       | 5166   | 1446    | 3357   | 2140    | 3275   | 2341    | 1633   | 1353    | 1071     | 948     |
| 5       | 274    | 78      | 210    | 165     | 225    | 160     | 201    | 143     |          |         |
| 6       | 958    | 191     | 636    | 365     | 510    | 367     | 525    | 421     | 562      | 445     |
| 7       | 491    | 278     | 459    | 388     | 376    | 330     | 315    | 313     | 237      | 223     |
| 8       | 166    | 41      | 154    | 88      | 121    | 99      | 114    | 104     | 166      | 147     |
| 9       | 600    | 134     | 425    | 236     | 730    | 512     | 1762   | 1668    | 4179     | 3498    |
| 10      | 5770   | 3032    | 4002   | 3633    | 5023   | 4465    | 5473   | 5128    | 7527     | 7170    |
| 11      | 3491   | 848     | 2887   | 1660    | 1559   | 1236    | 979    | 838     |          |         |
| 12      | 1826   | 213     | 1573   | 853     | 1452   | 1109    | 1650   | 1422    |          |         |
| 13      | 365    | 82      | 439    | 262     | 552    | 388     | 571    | 444     | 455      | 404     |
| 14      | 3248   | 1011    | 2420   | 1667    | 2447   | 2033    | 3342   | 3178    |          |         |
| 15      | 237    | 161     | 234    | 187     | 275    | 231     | 216    | 202     | 77       | 77      |

Note: D1: ten minutes after initiation of Cytosorb®, D2: one hour after initiation of Cytosorb®, D3: three hours after initiation of Cytosorb®, D4: six hours after initiation of Cytosorb®, D5: twelve hours after initiation of Cytosorb®, pre: extracorporeal IL-6 concentration pre-Cytosorb®, post: extracorporeal IL-6 concentration post-Cytosorb®.

Table S4: IL-8 concentration (pg/ml) pre- and post-Cytosorb® at different timepoints

| Patient | D1 pre | D1 post | D2 pre | D2 post | D3 pre | D3 post | D4 pre | D4 post | D5 pre | D5 post |
|---------|--------|---------|--------|---------|--------|---------|--------|---------|--------|---------|
| 1       | 17000  | 4086    | 18265  | 12819   | 16720  | 20876   | 11879  | 17785   | 27434  | 29252   |
| 2       | 20583  | 7393    | 22773  | 10401   | 19182  | 12895   | 14393  | 23455   | 22792  | 22459   |
| 3       | 262    | 43      | 291    | 119     | 269    | 164     | 228    | 144     | 219    | 168     |
| 4       | 3842   | 886     | 1597   | 1266    | 1546   | 1043    | 1027   | 693     | 999    | 766     |
| 5       | 125    | 25      | 105    | 70      | 118    | 64      | 73     | 52      |        |         |
| 6       | 40     | 11      | 48     | 21      | 46     | 22      | 32     | 22      | 22     | 14      |
| 7       | 145    | 46      | 138    | 77      | 104    | 73      | 72     | 73      | 100    | 89      |
| 8       | 54     | 6       | 59     | 13      | 55     | 30      | 50     | 23      | 46     | 29      |
| 9       | 91     | 12      | 66     | 25      | 64     | 35      | 217    | 151     | 448    | 393     |
| 10      | 891    | 219     | 623    | 412     | 719    | 543     | 1097   | 795     | 1163   | 1144    |
| 11      | 443    | 39      | 276    | 77      | 270    | 113     | 182    | 100     |        |         |
| 12      | 400    | 67      | 193    | 125     | 193    | 156     | 167    | 144     |        |         |
| 13      | 721    | 113     | 536    | 242     | 292    | 260     | 347    | 208     | 205    | 158     |
| 14      | 322    | 70      | 271    | 94      | 254    | 159     | 560    | 380     |        |         |
| 15      | 157    | 83      | 143    | 98      | 178    | 103     | 160    | 127     | 84     | 68      |

Note: D1: ten minutes after initiation of Cytosorb®, D2: one hour after initiation of Cytosorb®, D3: three hours after initiation of Cytosorb®, D4: six hours after initiation of Cytosorb®, D5: twelve hours after initiation of Cytosorb®, pre: extracorporeal IL-8 concentration pre-Cytosorb®, post: extracorporeal IL-8 concentration post-Cytosorb®.

Table S5: IFN- $\gamma$  concentration (pg/ml) pre- and post-Cytosorb® at different timepoints

| Patient | D1 pre | D1 post | D2 pre | D2 post | D3 pre | D3 post | D4 pre | D4 post | D5 pre | D5 post |
|---------|--------|---------|--------|---------|--------|---------|--------|---------|--------|---------|
| 1       | 71,12  | 58,46   | 71,63  | 62,33   | 67,49  | 60,78   | 70,6   | 65,68   | 64,91  | 69,56   |
| 2       | 65,94  | 56,92   | 63,36  | 61,81   | 74,23  | 64,91   | 70,6   | 63,36   | 77,86  | 69,56   |
| 3       | 51,53  | 28,39   | 58,72  | 46,66   | 56,66  | 47,94   | 53,58  | 48,96   | 57,69  | 54,35   |
| 4       | 80,97  | 33,88   | 57,35  | 54,03   | 61,97  | 46,03   | 45,36  | 29,78   | 25,3   | 30,12   |
| 5       | 13,31  | 2,41    | 8,18   | 4       | 5,55   | 4,39    | 7,06   | 3,21    |        |         |
| 6       | 3,21   | 0,74    | 1,59   | 0,74    | 4      | 0,3     | 0,74   | 1,59    | 0,3    | 0,74    |
| 7       | 17,95  | 8,93    | 19,71  | 17,95   | 13,67  | 15,1    | 11,5   | 11,5    | 9,3    | 8,56    |
| 8       | 0,74   | 0,1     | 3,21   | 1,59    | 3,21   | 0,74    | 1,59   | 1,17    | 4      | 4,78    |
| 9       |        |         |        |         |        |         |        |         |        |         |
| 10      | 36,42  | 12,05   | 33,63  | 23,65   | 38,81  | 36,82   | 44,78  | 39,21   | 38,41  | 43,19   |
| 11      | 22,85  | 0,3     | 12,05  | 14,05   | 24,05  | 18,46   | 27,65  | 21,66   |        |         |
| 12      | 47,17  | 12,85   | 38,41  | 26,45   | 36,02  | 30,84   | 36,82  | 36,82   |        |         |
| 13      |        |         |        |         |        |         |        |         |        |         |
| 14      | 16,06  | 0,3     | 10,44  | 0,2     | 12,05  | 5,22    | 10,04  | 8,03    |        |         |
| 15      |        |         |        |         |        |         |        |         |        |         |

Note: D1: ten minutes after initiation of Cytosorb®, D2: one hour after initiation of Cytosorb®, D3: three hours after initiation of Cytosorb®, D4: six hours after initiation of Cytosorb®, D5: twelve hours after initiation of Cytosorb®, pre: extracorporeal IFN- $\gamma$  concentration pre-Cytosorb®, post: extracorporeal IFN- $\gamma$  concentration post-Cytosorb®.

Table S6: TNF- $\alpha$  concentration (pg/ml) pre- and post-Cytosorb® at different timepoints

| Patient | D1 pre | D1 post | D2 pre | D2 post | D3 pre | D3 post | D4 pre | D4 post | D5 pre | D5 post |
|---------|--------|---------|--------|---------|--------|---------|--------|---------|--------|---------|
| 1       | 618,8  | 311,5   | 652,4  | 563,9   | 710,8  | 635,6   | 677,5  | 576,6   | 777,0  | 735,7   |
| 2       | 614,6  | 376,0   | 519,1  | 400,1   | 499,8  | 478,3   | 430,7  | 417,6   | 400,1  | 356,1   |
| 3       | 270,9  | 115,7   | 270,9  | 227,4   | 316,0  | 261,8   | 225,0  | 168,8   | 183,0  | 154,5   |
| 4       | 601,3  | 419,0   | 491,7  | 462,9   | 467,8  | 409,2   | 338,4  | 317,6   | 364,0  | 364,0   |
| 5       | 202,4  | 154,7   | 99,9   | 136,0   | 67,9   | 103,3   | 103,3  | 116,6   |        |         |
| 6       | 52,6   | 129,6   | 67,9   | 178,9   | 82,5   | 166,9   | 75,27  | 157,8   | 86,02  | 110,0   |
| 7       | 181,9  | 208,2   | 225,3  | 211,1   | 178,9  | 157,8   | 266,9  | 219,7   | 166,9  | 166,9   |
| 8       | 27,1   | 36,05   | 36,0   | 181,9   | 40,3   | 142,3   | 27,1   | 78,9    | 36,0   | 75,3    |
| 9       | 60,3   | 6,0     | 27,1   | 40,3    | 67,9   | 60,3    | 44,5   | 71,61   | 213,9  | 202,4   |
| 10      | 99,2   | 95,62   | 69,4   | 120,9   | 77,0   | 77,0    | 69,4   | 77,0    | 77,0   | 73,2    |
| 11      | 222,9  | 80,77   | 386,8  | 343,8   | 386,8  | 350,0   | 309,5  | 255,5   |        |         |
| 12      | 453,2  | 128,0   | 494,8  | 306,4   | 368,5  | 362,3   | 386,8  | 337,6   |        |         |
| 13      | 399,0  | 203,1   | 142,0  | 242,5   | 183,1  | 203,1   | 209,8  | 236,0   | 113,8  | 189,8   |
| 14      | 331,4  | 293,7   | 287,4  | 265,1   | 206,5  | 189,8   | 242,5  | 222,9   |        |         |
| 15      | 90,9   | 105,6   | 68,3   | 90,9    | 56,8   | 68,3    | 79,7   | 105,6   | 60,63  | 105,6   |

Note: D1: ten minutes after initiation of Cytosorb®, D2: one hour after initiation of Cytosorb®, D3: three hours after initiation of Cytosorb®, D4: six hours after initiation of Cytosorb®, D5: twelve hours after initiation of Cytosorb®, pre: extracorporeal TNF- $\alpha$  concentration pre-Cytosorb®, post: extracorporeal TNF- $\alpha$  concentration post-Cytosorb®.

Table S7: VEGF concentration (pg/ml) pre- and post-Cytosorb® at different timepoints

| Patient | D1 pre | D1 post | D2 pre | D2 post | D3 pre | D3 post | D4 pre | D4 post | D5 pre | D5 post |
|---------|--------|---------|--------|---------|--------|---------|--------|---------|--------|---------|
| 1       | 496,8  | 194,3   | 448,1  | 394,0   | 696,5  | 429,3   | 526,2  | 472,7   | 600,0  | 683,5   |
| 2       | 686,1  | 367,5   | 613,7  | 514,5   | 717,3  | 583,2   | 632,8  | 523,3   | 520,3  | 466,6   |
| 3       | 454,3  | 70,5    | 429,3  | 215,6   | 377,5  | 259,8   | 322,6  | 278,8   | 429,3  | 397,2   |
| 4       | 472,1  | 176,2   | 383,0  | 313,1   | 360,4  | 272,9   | 318,0  | 188,7   | 288,3  | 182,5   |
| 5       | 176,2  | 24,6    | 89,3   | 71,2    | 163,3  | 24,6    | 121,4  | 105,9   |        |         |
| 6       | 80,5   | 10,0    | 71,2   | 24,6    | 61,2   | 50,5    | 50,5   | 71,16   | 50,5   | 50,5    |
| 7       | 105,9  | 71,2    | 50,5   | 89,3    | 89,3   | 80,5    | 89,3   | 106,0   | 121,4  | 89,3    |
| 8       | 89,3   | 24,6    | 121,4  | 10,0    | 121,4  | 105,9   | 50,5   | 89,3    | 105,9  | 89,3    |
| 9       |        |         |        |         |        |         |        |         |        |         |
| 10      | 219,8  | 151,3   | 108,5  | 176,0   | 151,3  | 175,9   | 239,8  | 175,9   | 123,8  | 239,8   |
| 11      | 258,8  | 123,8   | 277,0  | 239,8   | 311,3  | 239,8   | 219,8  | 249,4   |        |         |
| 12      | 457,3  | 50,1    | 444,0  | 249,4   | 373,9  | 327,7   | 495,6  | 343,5   |        |         |
| 13      | 294,5  | 151,3   | 176,0  | 176,0   | 176,0  | 91,8    | 175,9  | 198,7   | 123,8  | 219,8   |
| 14      | 285,8  | 151,3   | 230,0  | 187,5   | 239,8  | 163,9   | 239,8  | 239,8   |        |         |
| 15      | 63,0   | 45,9    | 36,3   | 25,6    | 78,4   | 63,0    | 78,4   | 25,6    | 25,6   | 78,4    |

Note: D1: ten minutes after initiation of Cytosorb®, D2: one hour after initiation of Cytosorb®, D3: three hours after initiation of Cytosorb®, D4: six hours after initiation of Cytosorb®, D5: twelve hours after initiation of Cytosorb®, pre: extracorporeal VEGF concentration pre-Cytosorb®, post: extracorporeal VEGF concentration post-Cytosorb®.

Table S8: IP-10 concentration (pg/ml) pre- and post-Cytosorb® at different timepoints

| Patient | D1 pre | D1 post | D2 pre | D2 post | D3 pre | D3 post | D4 pre | D4 post | D5 pre | D5 post |
|---------|--------|---------|--------|---------|--------|---------|--------|---------|--------|---------|
| 1       | 18870  | 343     | 17444  | 3816    | 21716  | 9855    | 27021  | 20429   | 28802  | 27120   |
| 2       | 5309   | 543     | 4001   | 1302    | 4512   | 2476,9  | 4663   | 3006    | 6087   | 3631    |
| 3       | 26084  | 667     | 25821  | 4929    | 31005  | 10417   | 24989  | 11233   | 22085  | 13285   |
| 4       | 9816   | 367     | 15238  | 1564    | 25667  | 3032    | 28121  | 3606    | 21891  | 2636    |
| 5       | 2090   | 41      | 1777   | 179     | 1675   | 279     | 1467   | 203,01  |        |         |
| 6       | 412    | 10      | 315    | 21      | 234    | 29      | 225    | 45,89   | 181    | 41      |
| 7       | 579    | 53      | 511    | 253     | 435    | 242     | 423    | 272     | 397    | 253     |
| 8       | 944    | 2       | 923    | 18      | 738    | 35      | 647    | 60,32   | 791    | 92      |
| 9       | 582    | 5       | 289    | 5       | 192    | 10      | 349    | 38,42   | 403    | 74      |
| 10      | 1596   | 59      | 916    | 213     | 1008   | 380     | 1037   | 515     | 964    | 628     |
| 11      | 5170   | 92      | 4134   | 499     | 3941   | 996     | 3817   | 1353    |        |         |
| 12      | 20130  | 352     | 17900  | 2119    | 14998  | 4474    | 15616  | 7760    |        |         |
| 13      | 655    | 11      | 531    | 31      | 392    | 40      | 332    | 65      | 280    | 101     |
| 14      | 3610   | 43      | 2305   | 107     | 1792   | 363     | 1935   | 812     |        |         |
| 15      | 186    | 3       | 137    | 15      | 119    | 24      | 162    | 44      | 256    | 116     |

Note: D1: ten minutes after initiation of Cytosorb®, D2: one hour after initiation of Cytosorb®, D3: three hours after initiation of Cytosorb®, D4: six hours after initiation of Cytosorb®, D5: twelve hours after initiation of Cytosorb®, pre: extracorporeal IP-10 concentration pre-Cytosorb®, post: extracorporeal IP-10 concentration post-Cytosorb®.

Table S9: MCP-1 concentration (pg/ml) pre- and post-Cytosorb® at different timepoints

| Patient | D1 pre | D1 post | D2 pre | D2 post | D3 pre | D3 post | D4 pre | D4 post | D5 pre | D5 post |
|---------|--------|---------|--------|---------|--------|---------|--------|---------|--------|---------|
| 1       | 3617   | 3159    | 3563   | 3429    | 3262   | 3180    | 3501   | 3355    | 3262   | 3210    |
| 2       | 3171   | 2598    | 3203   | 3204    | 3504   | 3436    | 3559   | 3401    | 3887   | 3716    |
| 3       | 3413   | 1470    | 3367   | 2665    | 3589   | 2843    | 3364   | 2886    | 3164   | 2646    |
| 4       | 3400   | 2126    | 2761   | 2566    | 3091   | 2504    | 2608   | 2066    | 1949   | 1701    |
| 5       | 362    | 104     | 308    | 190     | 206    | 142     | 200    | 132     |        |         |
| 6       | 93     | 20      | 89     | 43      | 64     | 43      | 55     | 42      | 40     | 28      |
| 7       | 535    | 312     | 569    | 481     | 441    | 403     | 359    | 331     | 282    | 280     |
| 8       | 212    | 58      | 219    | 107     | 176    | 127     | 240    | 182     | 320    | 240     |
| 9       | 76     | 23      | 67     | 39      | 65     | 49      | 375    | 329     | 481    | 431     |
| 10      | 983    | 349     | 862    | 674     | 1063   | 870     | 1337   | 1165    | 1066   | 992     |
| 11      | 777    | 193     | 586    | 473     | 880    | 652     | 954    | 786     |        |         |
| 12      | 1272   | 350     | 1070   | 714     | 942    | 766     | 1015   | 966     |        |         |
| 13      | 722    | 197     | 716    | 414     | 454    | 374     | 266    | 246     | 226    | 203     |
| 14      | 650    | 181     | 516    | 305     | 468    | 321     | 497    | 428     |        |         |
| 15      | 46     | 27      | 41     | 37      | 51     | 41      | 73     | 55      | 94     | 82      |

Note: D1: ten minutes after initiation of Cytosorb®, D2: one hour after initiation of Cytosorb®, D3: three hours after initiation of Cytosorb®, D4: six hours after initiation of Cytosorb®, D5: twelve hours after initiation of Cytosorb®, pre: extracorporeal MCP-1 concentration pre-Cytosorb®, post: extracorporeal MCP-1 concentration post-Cytosorb®.

Table S10: MIP-1a concentration (pg/ml) pre- and post-Cytosorb® at different timepoints

| Patient | D1 pre | D1 post | D2 pre | D2 post | D3 pre | D3 post | D4 pre | D4 post | D5 pre | D5 post |
|---------|--------|---------|--------|---------|--------|---------|--------|---------|--------|---------|
| 1       | 47,8   | 5,6     | 55,0   | 32,0    | 62,6   | 42,6    | 40,6   | 36,4    | 76,3   | 71,8    |
| 2       | 163,6  | 39,1    | 162,0  | 88,2    | 133,8  | 105,7   | 126,4  | 107,3   | 102,7  | 78,6    |
| 3       | 51,8   | 9,7     | 51,0   | 27,2    | 43,7   | 33,8    | 42,4   | 33,9    | 44,1   | 45,8    |
| 4       | 48,9   | 4,0     | 37,1   | 12,2    | 21,0   | 7,0     | 14,1   | 6,5     | 11,2   | 6,5     |
| 5       | 10,5   | 1,1     | 6,7    | 3,3     | 7,2    | 4,0     | 7,2    | 3,8     |        |         |
| 6       | 3,7    | 0,6     | 4,7    | 1,3     | 3,1    | 2,4     | 2,7    | 5,2     | 2,4    | 2,6     |
| 7       | 5,6    | 1,6     | 4,9    | 3,9     | 4,8    | 4,1     | 4,8    | 4,1     | 5,6    | 4,7     |
| 8       | 5,9    | 0,5     | 8,1    | 1,9     | 6,6    | 3,4     | 7,1    | 4,6     | 10,3   | 6,5     |
| 9       | 4,1    | 0,5     | 2,4    | 0,4     | 1,6    | 0,2     | 5,0    | 2,8     | 6,4    | 4,0     |
| 10      | 5,1    | 0,5     | 3,8    | 2,3     | 4,5    | 3,5     | 4,9    | 4,1     | 4,2    | 3,9     |
| 11      | 11,3   | 0,5     | 9,2    | 3,9     | 10,6   | 5,9     | 10,5   | 7,3     |        |         |
| 12      | 32,8   | 2,1     | 30,3   | 9,9     | 25,8   | 15,6    | 25,8   | 19,6    |        |         |
| 13      | 9,3    | 1,0     | 7,2    | 2,0     | 5,4    | 2,7     | 4,2    | 4,1     | 4,0    | 5,4     |
| 14      | 8,4    | 0,5     | 5,8    | 2,5     | 6,2    | 3,9     | 6,3    | 4,9     |        |         |
| 15      | 2,3    | 0,4     | 1,6    | 1,0     | 2,0    | 1,4     | 3,0    | 2,1     | 3,6    | 3,0     |

Note: D1: ten minutes after initiation of Cytosorb®, D2: one hour after initiation of Cytosorb®, D3: three hours after initiation of Cytosorb®, D4: six hours after initiation of Cytosorb®, D5: twelve hours after initiation of Cytosorb®, pre: extracorporeal MIP-1a concentration pre-Cytosorb®, post: extracorporeal MIP-1a concentration post-Cytosorb®.

Table S11: RANTES concentration (pg/ml) pre- and post-Cytosorb® at different timepoints

| Patient | D1 pre | D1 post | D2 pre | D2 post | D3 pre | D3 post | D4 pre | D4 post | D5 pre | D5 post |
|---------|--------|---------|--------|---------|--------|---------|--------|---------|--------|---------|
| 1       | 4109   | 654     | 2912   | 3079    | 2896   | 2793    | 5099   | 4601    | 5471   | 5113    |
| 2       | 1266   | 688     | 669    | 566     | 1129   | 1235    | 486    | 554     | 469    | 371     |
| 3       | 478    | 357     | 558    | 809     | 1176   | 896     | 412    | 368     | 257    | 195     |
| 4       | 5807   | 2258    | 3052   | 3120    | 2100   | 2578    | 1058   | 1368    | 1343   | 1562    |
| 5       | 481    | 392     | 138    | 309     | 94     | 204     | 226    | 259     |        |         |
| 6       | 132    | 298     | 192    | 392     | 214    | 422     | 168    | 345     | 207    | 224     |
| 7       | 529    | 838     | 719    | 741     | 670    | 571     | 958,11 | 760     | 414    | 44      |
| 8       | 131    | 161     | 206    | 578     | 149    | 418     | 107    | 285     | 91     | 195     |
| 9       | 210    | 120     | 118    | 170     | 196    | 232     | 163    | 257     | 731    | 653     |
| 10      | 91     | 222     | 47     | 327     | 71     | 140     | 62,32  | 95      | 79     | 46      |
| 11      | 326    | 112     | 1912   | 2120    | 2874   | 1923    | 1094   | 654     |        |         |
| 12      | 681    | 230     | 822    | 754     | 808    | 1010    | 698    | 846     |        |         |
| 13      | 2112   | 585     | 426    | 947     | 569    | 584     | 684    | 785     | 434    | 533     |
| 14      | 1533   | 843     | 994    | 986     | 650    | 567     | 838    | 741     |        |         |
| 15      | 288    | 340     | 205    | 323     | 171    | 378     | 284    | 377     | 174    | 272     |

Note: D1: ten minutes after initiation of Cytosorb®, D2: one hour after initiation of Cytosorb®, D3: three hours after initiation of Cytosorb®, D4: six hours after initiation of Cytosorb®, D5: twelve hours after initiation of Cytosorb®, pre: extracorporeal RANTES concentration pre-Cytosorb®, post: extracorporeal RANTES concentration post-Cytosorb®.

Table S12: ICAM concentration (pg/ml) pre- and post-Cytosorb® at different timepoints

| Patient | D1 pre | D1 post | D2 pre | D2 post | D3 pre | D3 post | D4 pre | D4 post | D5 pre | D5 post |
|---------|--------|---------|--------|---------|--------|---------|--------|---------|--------|---------|
| 1       | 432664 | 343511  | 410800 | 381037  | 465117 | 358339  | 344388 | 283741  | 562712 | 525019  |
| 2       | 485717 | 396964  | 489034 | 457801  | 427749 | 420557  | 327853 | 386514  | 398882 | 388085  |
| 3       | 534772 | 424418  | 570861 | 524496  | 394853 | 534395  | 596952 | 544766  | 596713 | 548042  |
| 4       | 275024 | 221928  | 289421 | 245046  | 291281 | 284301  | 293366 | 285333  | 266816 | 290624  |
| 5       | 771153 | 757347  | 729803 | 717745  | 842771 | 801100  | 931518 | 842969  |        |         |
| 6       | 160025 | 144051  | 149392 | 135945  | 153292 | 141618  | 150645 | 138314  | 171571 | 164171  |
| 7       | 530152 | 438812  | 533149 | 532929  | 492754 | 453830  | 468158 | 480716  | 535348 | 513158  |
| 8       | 267665 | 236917  | 301597 | 251503  | 295401 | 264699  | 307116 | 274274  | 325922 | 310818  |
| 9       | 284410 | 230238  | 238953 | 224471  | 240791 | 214651  | 245406 | 232558  | 294686 | 283000  |
| 10      | 412452 | 345695  | 364967 | 349283  | 413206 | 395936  | 419641 | 361739  | 375202 | 396741  |
| 11      | 926583 | 633312  | 778074 | 783417  | 882229 | 844604  | 891668 | 794529  |        |         |

|    |            |            |            |            |            |            |            |            |            |            |
|----|------------|------------|------------|------------|------------|------------|------------|------------|------------|------------|
| 12 | 84765<br>1 | 55467<br>7 | 78271<br>5 | 65374<br>5 | 77728<br>7 | 71930<br>2 | 78253<br>9 | 63176<br>7 |            |            |
| 13 | 20828<br>9 | 14496<br>3 | 21011<br>4 | 16273<br>2 | 23183<br>7 | 20032<br>4 | 23402<br>3 | 21250<br>2 | 28590<br>0 | 26864<br>1 |
| 14 | 28204<br>9 | 22037<br>1 | 26432<br>3 | 23131<br>7 | 25537<br>2 | 22376<br>5 | 26141<br>9 | 26045<br>3 |            |            |
| 15 | 23219<br>0 | 25362<br>4 | 27727<br>5 | 23571<br>5 | 25561<br>3 | 24636<br>5 | 23673<br>8 | 26667<br>2 | 26074<br>6 | 30569<br>1 |

Note: D1: ten minutes after initiation of Cytosorb®, D2: one hour after initiation of Cytosorb®, D3: three hours after initiation of Cytosorb®, D4: six hours after initiation of Cytosorb®, D5: twelve hours after initiation of Cytosorb®, pre: extracorporeal ICAM concentration pre-Cytosorb®, post: extracorporeal ICAM concentration post-Cytosorb®.

Table S13: VCAM concentration (pg/ml) pre- and post-Cytosorb® at different timepoints

| Patient | D1 pre      | D1 post     | D2 pre      | D2 post     | D3 pre      | D3 post     | D4 pre      | D4 post     | D5 pre      | D5 post     |
|---------|-------------|-------------|-------------|-------------|-------------|-------------|-------------|-------------|-------------|-------------|
| 1       | 12159<br>00 | 11477<br>00 | 13153<br>00 | 12415<br>00 | 16311<br>00 | 94078<br>5  | 10686<br>00 | 65427<br>8  | 23370<br>00 | 20275<br>00 |
| 2       | 85448<br>2  | 64881<br>8  | 81124<br>7  | 77396<br>4  | 84635<br>4  | 83750<br>9  | 64553<br>5  | 76173<br>2  | 76235<br>3  | 69196<br>4  |
| 3       | 83442<br>7  | 64919<br>4  | 88125<br>0  | 78438<br>7  | 56488<br>3  | 82001<br>0  | 96828<br>3  | 82567<br>0  | 88789<br>1  | 85358<br>9  |
| 4       | 70406<br>9  | 59137<br>5  | 72235<br>7  | 63070<br>0  | 71958<br>7  | 71564<br>0  | 66419<br>7  | 61197<br>0  | 62968<br>8  | 64189<br>0  |
| 5       | 20576<br>00 | 19400<br>00 | 18558<br>00 | 19198<br>00 | 26677<br>00 | 23725<br>00 | 27580<br>00 | 23675<br>00 |             |             |
| 6       | 73269<br>9  | 61678<br>5  | 63531<br>2  | 58985<br>9  | 68575<br>3  | 62070<br>6  | 69211<br>9  | 63282<br>0  | 71357<br>3  | 70974<br>3  |
| 7       | 14894<br>00 | 12282<br>00 | 14532<br>00 | 15072<br>00 | 14111<br>00 | 13207<br>00 | 13808<br>00 | 14114<br>00 | 16437<br>00 | 14177<br>00 |
| 8       | 14802<br>00 | 13735<br>00 | 17302<br>00 | 13963<br>00 | 16525<br>00 | 14889<br>00 | 14948<br>00 | 15203<br>00 | 17581<br>00 | 16066<br>00 |
| 9       | 94689<br>1  | 71367<br>1  | 83244<br>0  | 72821<br>4  | 84425<br>4  | 73589<br>8  | 80015<br>0  | 79489<br>9  | 91619<br>2  | 91160<br>1  |
| 10      | 13836<br>00 | 12903<br>00 | 13353<br>00 | 13562<br>00 | 15078<br>00 | 14909<br>00 | 15226<br>00 | 12104<br>00 | 13590<br>00 | 15382<br>00 |
| 11      | 20126<br>00 | 13678<br>00 | 12406<br>00 | 16181<br>00 | 19821<br>00 | 17902<br>00 | 21163<br>00 | 17778<br>00 |             |             |
| 12      | 15055<br>00 | 98531<br>5  | 14408<br>00 | 12362<br>00 | 14533<br>00 | 14522<br>00 | 15013<br>00 | 13529<br>00 |             |             |
| 13      | 80634<br>0  | 54192<br>9  | 76639<br>2  | 61340<br>9  | 85895<br>2  | 70060<br>4  | 90443<br>8  | 80877<br>5  | 83440<br>5  | 77149<br>6  |
| 14      | 12603<br>00 | 10040<br>00 | 11625<br>00 | 11131<br>00 | 12263<br>00 | 10650<br>00 | 12744<br>00 | 11594<br>00 |             |             |
| 15      | 15101<br>00 | 15549<br>00 | 19040<br>00 | 14623<br>00 | 15316<br>00 | 16943<br>00 | 15758<br>00 | 15584<br>00 | 18085<br>00 | 21742<br>00 |

Note: D1: ten minutes after initiation of Cytosorb®, D2: one hour after initiation of Cytosorb®, D3: three hours after initiation of Cytosorb®, D4: six hours after initiation of Cytosorb®, D5: twelve hours after initiation of Cytosorb®, pre: extracorporeal VCAM concentration pre-Cytosorb®, post: extracorporeal VCAM concentration post-Cytosorb®.



Table S14: IL-4 concentration (pg/ml) pre- and post-Cytosorb® at different timepoints

| Patient | D1 pre | D1 post | D2 pre | D2 post | D3 pre | D3 post | D4 pre | D4 post | D5 pre | D5 post |
|---------|--------|---------|--------|---------|--------|---------|--------|---------|--------|---------|
| 1       | 23,25  | 18,2    | 24,94  | 19,1    | 24,52  | 20,43   | 23,36  | 21,31   | 23,04  | 26,71   |
| 2       | 25,78  | 17,52   | 25,99  | 20,87   | 25,78  | 22,71   | 24,1   | 21,53   | 24,1   | 21,74   |
| 3       | 7,02   | 0,1     | 6,73   | 1,47    | 6      | 3,49    | 7,02   | 3,32    | 5,55   | 5,1     |
| 4       | 10,34  | 3,62    | 7,13   | 4,71    | 7,98   | 4,44    | 4,97   | 3,2     | 3,9    | 2,77    |
| 5       | 1,22   | 0,87    | 0,69   | 0,49    | 0,87   | 0,49    | 0,87   | 0,49    |        |         |
| 6       | 1,55   | 0,49    | 1,55   | 0,87    | 1,22   | 0,87    | 0,87   | 1,38    | 0,69   | 1,22    |
| 7       |        |         |        |         |        |         |        |         |        |         |
| 8       |        |         |        |         |        |         |        |         |        |         |
| 9       |        |         |        |         |        |         |        |         |        |         |
| 10      | 9,35   | 5,51    | 7,62   | 6,71    | 9,76   | 8,06    | 9,35   | 8,5     | 11,37  | 10,17   |
| 11      | 9,56   | 2,44    | 7,17   | 5,25    | 4,74   | 4,21    | 3,07   | 2,44    |        |         |
| 12      | 9,76   | 0,97    | 8,93   | 3,07    | 8,5    | 3,93    | 8,06   | 5,75    |        |         |
| 13      | 2,44   | 0,97    | 1,76   | 0,97    | 1,76   | 0,3     | 1,76   | 2,44    | 0,97   | 1,39    |
| 14      | 6,71   | 2,44    | 5      | 3,07    | 4,74   | 4,21    | 7,17   | 6,24    |        |         |
| 15      |        |         |        |         |        |         |        |         |        |         |

Note: D1: ten minutes after initiation of Cytosorb®, D2: one hour after initiation of Cytosorb®, D3: three hours after initiation of Cytosorb®, D4: six hours after initiation of Cytosorb®, D5: twelve hours after initiation of Cytosorb®, pre: extracorporeal IL-4 concentration pre-Cytosorb®, post: extracorporeal IL-4 concentration post-Cytosorb®.

Table S15: IL-5 concentration (pg/ml) pre- and post-Cytosorb® at different timepoints

| Patient | D1 pre | D1 post | D2 pre | D2 post | D3 pre | D3 post | D4 pre | D4 post | D5 pre | D5 post |
|---------|--------|---------|--------|---------|--------|---------|--------|---------|--------|---------|
| 1       | 601,9  | 541,1   | 692,0  | 711,9   | 942,3  | 731,7   | 756,5  | 726,8   | 766,3  | 672,1   |
| 2       | 751,5  | 530,9   | 530,9  | 464,3   | 869,4  | 571,5   | 530,9  | 576,6   | 662,1  | 596,8   |
| 3       | 219,9  | 3,9     | 354,7  | 135,3   | 158,2  | 158,3   | 241,9  | 214,3   | 197,7  | 236,4   |
| 4       | 411,9  | 146,9   | 342,6  | 236,1   | 382,3  | 266,9   | 287,2  | 162,9   | 210,2  | 225,8   |
| 5       | 81,0   | 1,0     | 58,2   | 34,5    | 69,7   | 34,5    | 69,7   | 34,5    |        |         |
| 6       | 75,4   | 28,4    | 81,0   | 58,2    | 40,5   | 46,5    | 69,7   | 46,5    | 40,5   | 34,5    |
| 7       | 81,0   | 40,5    | 69,7   | 69,7    | 69,7   | 46,5    | 52,3   | 34,5    | 34,5   | 46,4    |
| 8       | 46,5   | 9,1     | 58,2   | 2,0     | 34,5   | 9,1     | 22,1   | 34,5    | 46,5   | 9,1     |
| 9       | 52,3   | 9,1     | 40,5   | 22,1    | 58,2   | 15,8    | 114,4  | 103,4   | 189,3  | 205,0   |
| 10      | 343,3  | 245,8   | 282,2  | 326,2   | 334,8  | 264,2   | 334,8  | 334,8   | 426,6  | 450,8   |
| 11      | 264,2  | 28,9    | 245,8  | 127,1   | 188,7  | 148,3   | 198,5  | 81,8    |        |         |
| 12      | 351,9  | 28,9    | 368,8  | 188,7   | 300,0  | 188,7   | 317,5  | 282,2   |        |         |
| 13      | 105,1  | 69,6    | 81,8   | 81,8    | 81,8   | 81,8    | 81,8   | 81,8    | 93,6   | 93,6    |
| 14      | 227,2  | 116,2   | 245,8  | 69,6    | 227,2  | 227,2   | 264,2  | 264,2   |        |         |
| 15      |        |         |        |         |        |         |        |         |        |         |

Note: D1: ten minutes after initiation of Cytosorb®, D2: one hour after initiation of Cytosorb®, D3: three hours after initiation of Cytosorb®, D4: six hours after initiation of Cytosorb®, D5: twelve hours after initiation of Cytosorb®, pre: extracorporeal IL-5 concentration pre-Cytosorb®, post: extracorporeal IL-5 concentration post-Cytosorb®.

Table S16: IL-10 concentration (pg/ml) pre- and post-Cytosorb® at different timepoints

| Patient | D1 pre | D1 post | D2 pre | D2 post | D3 pre | D3 post | D4 pre | D4 post | D5 pre | D5 post |
|---------|--------|---------|--------|---------|--------|---------|--------|---------|--------|---------|
| 1       | 348    | 118     | 388    | 275     | 453    | 346     | 234    | 191     | 235    | 235     |
| 2       | 1243   | 752     | 908    | 652     | 695    | 643     | 808    | 662     | 720    | 528     |
| 3       | 259    | 58      | 232    | 132     | 195    | 132     | 164    | 112     | 138    | 110     |
| 4       | 69     | 20      | 36     | 22      | 26     | 15      | 26     | 20      | 40     | 26      |
| 5       | 20     | 5       | 13     | 5       | 9      | 7       | 24     | 13      |        |         |
| 6       |        |         |        |         |        |         |        |         |        |         |
| 7       | 24     | 13      | 22     | 19      | 17     | 13      | 15     | 13      | 13     | 12      |
| 8       | 54     | 7       | 69     | 24      | 21     | 7       | 9      | 5       | 13     | 7       |
| 9       | 52     | 9       | 22     | 9       | 20     | 11      | 55     | 42      | 93     | 70      |
| 10      | 73     | 25      | 39     | 32      | 55     | 41      | 73     | 60      | 63     | 52      |
| 11      | 161    | 30      | 125    | 69      | 121    | 83      | 105    | 73      |        |         |
| 12      | 2487   | 452     | 2295   | 1312    | 1930   | 1571    | 1587   | 1420    |        |         |
| 13      | 149    | 34      | 105    | 60      | 73     | 43      | 45     | 39      | 36     | 32      |
| 14      | 65     | 12      | 52     | 25      | 35     | 25      | 48     | 40      |        |         |
| 15      | 51     | 18      | 35     | 25      | 27     | 17      | 29     | 25      | 23     | 21      |

Note: D1: ten minutes after initiation of Cytosorb®, D2: one hour after initiation of Cytosorb®, D3: three hours after initiation of Cytosorb®, D4: six hours after initiation of Cytosorb®, D5: twelve hours after initiation of Cytosorb®, pre: extracorporeal IL-10 concentration pre-Cytosorb®, post: extracorporeal IL-10 concentration post-Cytosorb®.

Table S17: FGF-basic concentration (pg/ml) pre- and post-Cytosorb® at different timepoints

| Patient | D1 pre | D1 post | D2 pre | D2 post | D3 pre | D3 post | D4 pre | D4 post | D5 pre | D5 post |
|---------|--------|---------|--------|---------|--------|---------|--------|---------|--------|---------|
| 1       | 97,2   | 77,2    | 107,6  | 91,6    | 114,5  | 100,5   | 119,1  | 102,0   | 112,2  | 124,3   |
| 2       | 113,0  | 75,5    | 111,4  | 95,6    | 105,2  | 103,6   | 102,8  | 94,0    | 98,9   | 87,4    |
| 3       | 59,2   | 8,8     | 57,3   | 20,5    | 55,4   | 31,5    | 57,3   | 34,9    | 53,5   | 49,6    |
| 4       | 57,2   | 33,3    | 53,1   | 33,3    | 57,2   | 33,3    | 44,7   | 30,8    | 40,3   | 27,0    |
| 5       |        |         |        |         |        |         |        |         |        |         |
| 6       |        |         |        |         |        |         |        |         |        |         |
| 7       |        |         |        |         |        |         |        |         |        |         |
| 8       |        |         |        |         |        |         |        |         |        |         |
| 9       |        |         |        |         |        |         |        |         |        |         |
| 10      | 42,6   | 30,6    | 33,8   | 33,8    | 36,8   | 41,2    | 42,6   | 42,6    | 48,1   | 45,4    |
| 11      | 36,8   | 16,5    | 36,8   | 27,4    | 36,8   | 27,4    | 33,8   | 27,4    |        |         |
| 12      | 63,4   | 1,0     | 63,4   | 24,0    | 45,4   | 30,6    | 54,7   | 36,8    |        |         |
| 13      | 22,2   | 1,0     | 16,5   | 16,5    | 20,4   | 24,0    | 20,4   | 20,4    | 16,5   | 20,4    |
| 14      | 32,2   | 22,2    | 33,8   | 27,4    | 27,4   | 20,4    | 33,8   | 24,0    |        |         |
| 15      |        |         |        |         |        |         |        |         |        |         |

Note: D1: ten minutes after initiation of Cytosorb®, D2: one hour after initiation of Cytosorb®, D3: three hours after initiation of Cytosorb®, D4: six hours after initiation of Cytosorb®, D5: twelve hours after initiation of Cytosorb®, pre: extracorporeal FGF-basic concentration pre-Cytosorb®, post: extracorporeal FGF-basic concentration post-Cytosorb®.

Table S18: PDGF concentration (pg/ml) pre- and post-Cytosorb® at different timepoints

| Patient | D1 pre | D1 post | D2 pre | D2 post | D3 pre | D3 post | D4 pre | D4 post | D5 pre | D5 post |
|---------|--------|---------|--------|---------|--------|---------|--------|---------|--------|---------|
| 1       | 611,0  | 122,3   | 520,8  | 546,0   | 516,6  | 646,7   | 1398,2 | 1136,8  | 1515,3 | 1268,5  |
| 2       | 167,5  | 41,1    | 128,5  | 61,3    | 124,4  | 118,3   | 97,8   | 118,3   | 142,8  | 89,7    |
| 3       | 57,2   | 5,4     | 77,5   | 83,6    | 171,6  | 114,2   | 65,3   | 53,2    | 61,3   | 13,2    |
| 4       | 623,6  | 195,6   | 362,4  | 317,7   | 216,7  | 239,6   | 108,9  | 110,6   | 81,6   | 126,1   |
| 5       |        |         |        |         |        |         |        |         |        |         |
| 6       |        |         |        |         |        |         |        |         |        |         |
| 7       | 48,0   | 54,7    | 71,5   | 68,1    | 48,0   | 58,1    | 71,5   | 68,1    | 41,4   | 38,1    |
| 8       |        |         |        |         |        |         |        |         |        |         |
| 9       | 34,8   | 2,9     | 10,6   | 0,1     | 2,9    | 2,9     | 17,0   | 9,1     | 88,4   | 78,2    |
| 10      | 45,3   | 20,7    | 26,9   | 61,7    | 33,1   | 41,3    | 41,3   | 45,4    | 41,3   | 24,8    |
| 11      | 69,8   | 33,1    | 210,0  | 243,7   | 241,8  | 162,2   | 81,9   | 53,5    |        |         |
| 12      | 98,1   | 12,4    | 98,1   | 81,9    | 86,0   | 88,0    | 86,0   | 73,8    |        |         |
| 13      | 90,0   | 14,5    | 37,2   | 57,6    | 37,2   | 29,0    | 16,5   | 37,2    | 33,1   | 37,2    |
| 14      | 94,0   | 61,7    | 61,7   | 59,6    | 49,4   | 41,3    | 61,7   | 65,7    |        |         |
| 15      | 56,5   | 49,2    | 34,7   | 71,1    | 29,9   | 83,4    | 51,6   | 113,0   | 37,1   | 34,7    |

Note: D1: ten minutes after initiation of Cytosorb®, D2: one hour after initiation of Cytosorb®, D3: three hours after initiation of Cytosorb®, D4: six hours after initiation of Cytosorb®, D5: twelve hours after initiation of Cytosorb®, pre: extracorporeal PDGF concentration pre-Cytosorb®, post: extracorporeal PDGF concentration post-Cytosorb®.

Table S19: GM-CSF concentration (pg/ml) pre- and post-Cytosorb® at different timepoints

| Patient | D1 pre | D1 post | D2 pre | D2 post | D3 pre | D3 post | D4 pre | D4 post | D5 pre | D5 post |
|---------|--------|---------|--------|---------|--------|---------|--------|---------|--------|---------|
| 1       | 43,88  | 18,76   | 47,89  | 38,74   | 82,79  | 63,66   | 80,68  | 72,49   | 125,19 | 118,69  |
| 2       | 18,3   | 9,16    | 19,96  | 13,79   | 17,84  | 15,99   | 17,23  | 14,42   | 12,17  | 10,52   |
| 3       | 1,93   | 0,05    | 4,43   | 0,1     | 3,22   | 0,1     | 2,8    | 0,1     | 1,93   | 0,97    |
| 4       | 7,16   | 0,21    | 7,16   | 1,98    | 5,56   | 2,47    | 4,73   | 1,45    | 2,47   | 0,21    |
| 5       |        |         |        |         |        |         |        |         |        |         |
| 6       |        |         |        |         |        |         |        |         |        |         |
| 7       |        |         |        |         |        |         |        |         |        |         |
| 8       |        |         |        |         |        |         |        |         |        |         |
| 9       |        |         |        |         |        |         |        |         |        |         |
| 10      |        |         |        |         |        |         |        |         |        |         |
| 11      |        |         |        |         |        |         |        |         |        |         |
| 12      |        |         |        |         |        |         |        |         |        |         |
| 13      |        |         |        |         |        |         |        |         |        |         |
| 14      |        |         |        |         |        |         |        |         |        |         |
| 15      |        |         |        |         |        |         |        |         |        |         |

Note: D1: ten minutes after initiation of Cytosorb®, D2: one hour after initiation of Cytosorb®, D3: three hours after initiation of Cytosorb®, D4: six hours after initiation of Cytosorb®, D5: twelve hours after initiation of Cytosorb®, pre: extracorporeal GM-CSF concentration pre-Cytosorb®, post: extracorporeal GM-CSF concentration post-Cytosorb®.
